# Supplementary material for: NarL, a Novel Repressor for CYP108j1 Expression during PAHs Degradation in Rhodococcus sp. P14
Source: MDPI journal article supplement (doi:10.3390/ijms21030983), 2020-02-01
Supplement: s1 [file s1]

## Supplementary Material

### Supplementary Tables S1–S2

### Supplementary Figures S1–S5

**Table S1.** List of strains and plasmids used in the study.

| Strain or Plasmids                               | Relevant characteristic(s)<br>(genotype)                                | Reference or source |
|--------------------------------------------------|-------------------------------------------------------------------------|---------------------|
| <b>Strain</b>                                    |                                                                         |                     |
| <i>Rhodococcus</i> sp. P14                       |                                                                         | (Song et al., 2011) |
| <i>Escherichia coli</i> DH5 $\alpha$             | Cloning strain                                                          | TaKaRa              |
| <i>E. coli</i> BL 21 DE3                         | Expression strain                                                       | TaKaRa              |
| $\Delta$ NarL                                    | <i>Rhodococcus</i> sp. P14 without functional <i>narl</i> gene          | This study          |
| <b>Plasmids (cloning and expression vectors)</b> |                                                                         |                     |
| pNV18                                            | <i>Rhodococcus</i> – <i>E. coli</i> shuttle vectors<br>Kan <sup>r</sup> | Keep in our lab     |
| pET-32a                                          | Expression plasmid, Amp <sup>r</sup>                                    | TaKaRa              |
| pMD <sup>TM</sup> 19-T                           | Cloning vector, Amp <sup>r</sup>                                        | TaKaRa              |
| pET-32a-Egfp                                     | Provide <i>egfp</i> gene                                                | Keep in our lab     |
| pK18mobsacB                                      | Suicide plasmid                                                         | Keep in our lab     |
| pACYCDuet-1                                      | Co-expression system plasmid                                            | Keep in our lab     |
| pUC19-P3b-m                                      | Synthesize the P3-B binding site<br>mutant plasmid                      | IGEbio              |
| pNV18-P3egfp                                     | pNV18 with promoter P3 and <i>egfp</i> ,<br>reverse Kan <sup>r</sup>    | This study          |
| pNV18-Egfp                                       | pNV18 with <i>egfp</i> , Kan <sup>r</sup>                               | This study          |
| pNV18-Egfp- reverse                              | pNV18 with <i>egfp</i> , reverse Kan <sup>r</sup>                       | This study          |

|                  |                                                                                                    |            |
|------------------|----------------------------------------------------------------------------------------------------|------------|
| pNV18-P3egfp-R-1 | pNV18 with 172 bp P3 promoter deleted 10 bp from the 5' terminus and egfp reverse Kan <sup>r</sup> | This study |
| pNV18-P3egfp-R-2 | pNV18 with 162 bp P3 promoter deleted 20 bp from the 5' terminus and egfp reverse Kan <sup>r</sup> | This study |
| pNV18-P3egfp-R-3 | pNV18 with 152 bp P3 promoter deleted 30 bp from the 5' terminus and egfp reverse Kan <sup>r</sup> | This study |
| pNV18-P3egfp-R-4 | pNV18 with 142 bp P3 promoter deleted 40 bp from the 5' terminus and egfp reverse Kan <sup>r</sup> | This study |
| pNV18-P3egfp-R-5 | pNV18 with 132 bp P3 promoter deleted 50 bp from the 5' terminus and egfp reverse Kan <sup>r</sup> | This study |
| pNV18-P3egfp-L-1 | pNV18 with 152 bp P3 promoter deleted 30 bp from the 3' terminus and egfp reverse Kan <sup>r</sup> | This study |
| pNV18-P3egfp-L-2 | pNV18 with 122 bp P3 promoter deleted 60 bp from the 3' terminus and egfp reverse Kan <sup>r</sup> | This study |
| pNV18-P3egfp-L-3 | pNV18 with 92 bp P3 promoter deleted 90 bp from the 3' terminus and egfp reverse Kan <sup>r</sup>  | This study |
| pNV18-P3egfp-L-4 | pNV18 with 62 bp P3 promoter deleted 120 bp from the 3' terminus and egfp reverse Kan <sup>r</sup> | This study |
| pNV18-P3egfp-L-5 | pNV18 with 32 bp P3 promoter deleted 150 bp from the 3' terminus and egfp reverse Kan <sup>r</sup> | This study |
| pET32a-NarI      | pET-32a with gene coding for NarL from the strain P14 for                                          | This study |

|                         |                                                                               |            |
|-------------------------|-------------------------------------------------------------------------------|------------|
|                         | expression and purification of NarL protein Amp <sup>r</sup>                  |            |
| pACYCDuet-1-Narl-P3Egfp | pACYCDuet-1 with <i>promoter P3</i> and <i>egfp</i> reverse and <i>narl</i>   | This study |
| pACYCDuet-1-P3Egfp.     | pACYCDuet-1 with <i>promoter P3</i> and <i>egfp</i> reverse                   | This study |
| pNV18-cassette          | Antibiotic cassette for suicide plasmid kan <sup>r</sup> and CM <sup>r</sup>  | This study |
| pK18mobsacb-Narl        | Knock out the gene <i>narl</i> in <i>Rhodococcus</i> sp. P14, CM <sup>r</sup> | This study |

**Table S2.** List of primers used in this study.

| Name           | Sequences                                 |
|----------------|-------------------------------------------|
| P302 L up      | CCCAAGCTTCGGACCGGCACGGGGCAGCGGGGGT        |
| P304 L up      | CCCAAGCTTTCGTTTCGCTGGTGTGATGCCCCTCA       |
| P305 L up      | CCCAAGCTTACGGCTGACAGGCTGAACTCACTCC        |
| P300JD R up    | CCCAAGCTTTCGGCGTACGCATCACCACATCGAC        |
| P301 R do      | GCCCTTGCTCACCATGTGAGTTCAGCCTGTCAGCCGTTAG  |
| P301-EGFP up   | TGACAGGCTGAACTCACATGGTGAGCAAGGGCGAGGAG    |
| P302 R do      | GCCCTTGCTCACCATCCTGTCAGCCGTTAGAGTGAGGGGC  |
| P302-EGFP R up | ACTCTAACGGCTGACAGGATGGTGAGCAAGGGCGAGGAG   |
| P303 R do      | GCCCTTGCTCACCATGTTAGAGTGAGGGGCATCACACCAG  |
| P303-EGFP R up | ATGCCCCTCACTCTAACATGGTGAGCAAGGGCGAGGAG    |
| P304 R do      | GCCCTTGCTCACCATGGGGCATCACACCAGCGAACGAAAG  |
| P304-EGFP R do | CGCTGGTGTGATGCCCCATGGTGAGCAAGGGCGAGGAG    |
| P305 R do      | GCCCTTGCTCACCATAACCAGCGAACGAAAGTTGTCCACCT |
| P305-EGFP R do | AACTTTCGTTTCGCTGGTATGGTGAGCAAGGGCGAGGAG   |
| P300JD-EGFP do | GCTCTAGATTACTTGTACAGCTCGTCCATGCCG         |

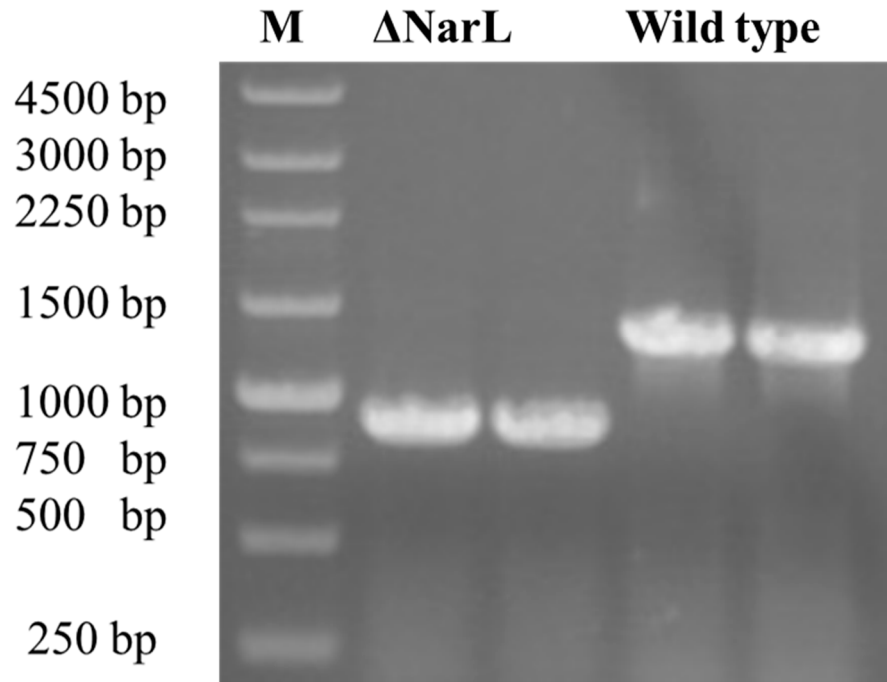

**Figure S1.** The PCR results of *narI* gene in wild type and  $\Delta$ NarL. M was the marker 250 bp DNA ladder (TaKaRaA. The *narI* gene had deletion 555 bp in  $\Delta$ NarL.

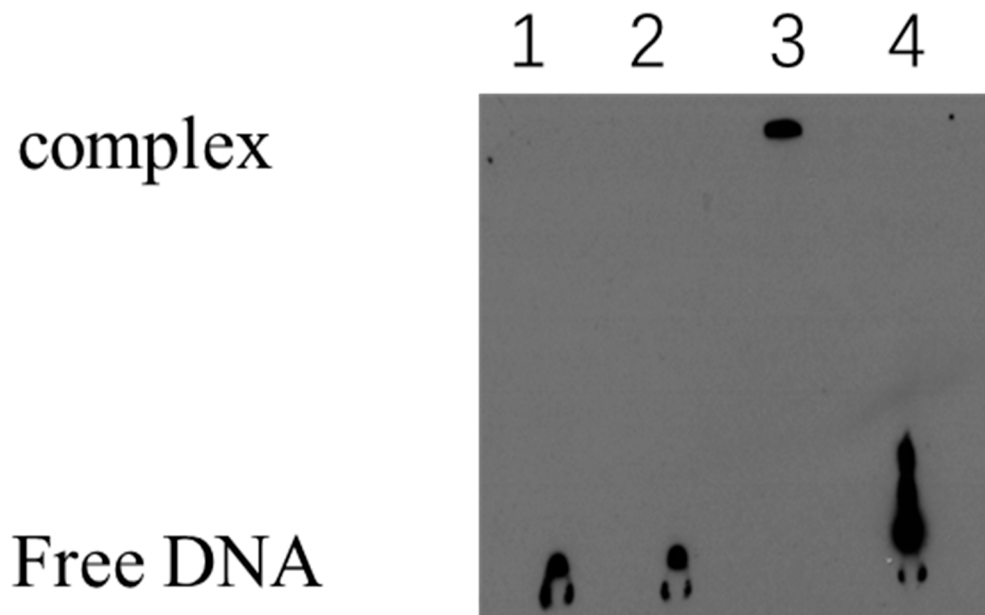

**Figure S2.** Competition experiments for the shift assay of P3-B and NarL. Lane 1 is P3-B (0.1  $\mu$ M), lane 2 is P3-B (0.1  $\mu$ M) and BSA (1  $\mu$ M), lane 3 is P3-B (0.1  $\mu$ M) and NarL (0.5  $\mu$ M), and lane 4 is P3-B (0.1  $\mu$ M), P3-B (unlabeled with biotin 15 $\mu$ M) and NarL (0.5  $\mu$ M).

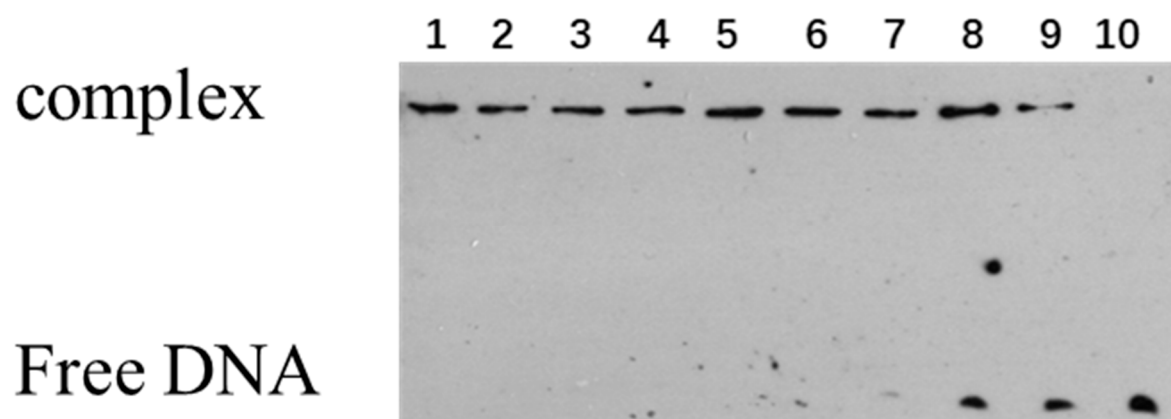

**Figure S3.** Effects of PAHs on NarL-DNA binding affinity. Lane 1 is DNA and NarL; lane 2 is DNA, NarL, and acetone; lane 3 is DNA, NarL, and biphenyl; and lane 4 is DNA, NarL, and hydroxy-biphenyl. Lanes 5, 6, and 7 are same as lane 2, 3, and 4, respectively. Lane 8 is DNA (excessive) and NarL; lane 9 is DNA (excessive), NarL, and hydroxy-biphenyl; and lane 10 is DNA. Comparing lanes 2–4 with lanes 5–7, samples were added in a different order. In lane 2–4, the DNA and protein were incubated first, then the PAHs were added. In lanes 5–7, PAHs and protein were incubated first, then DNA was. Neither of them were able to break the complex.

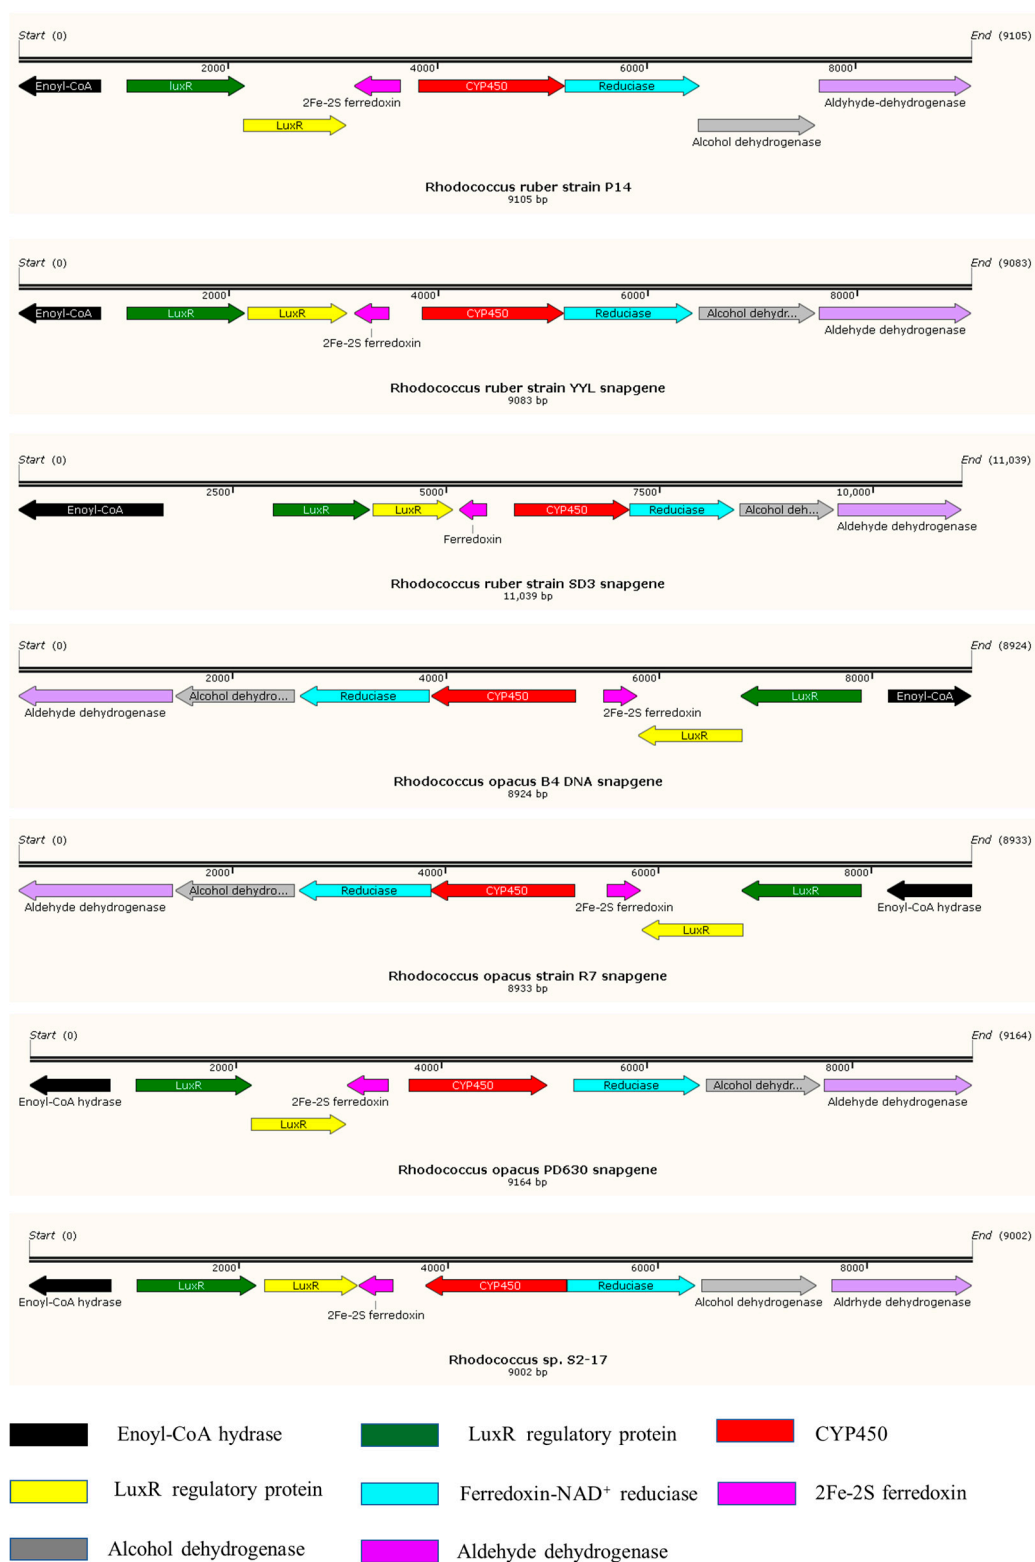

**Figure S4.** The conserved gene cluster consisting of CYP450 in the *Rhodococcus* genus.

A

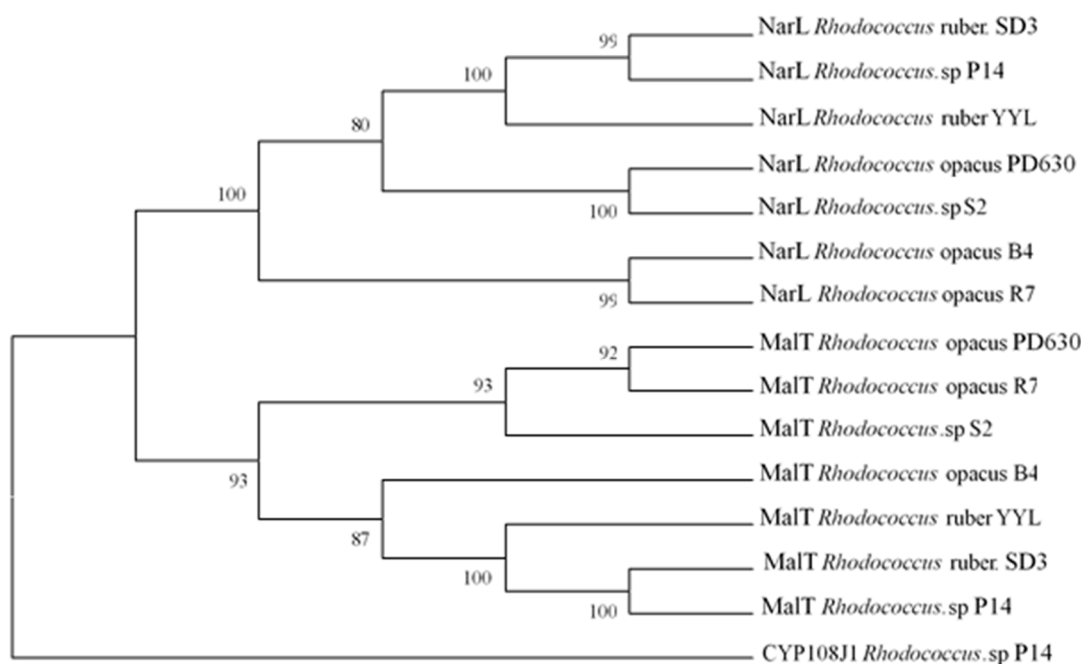

B

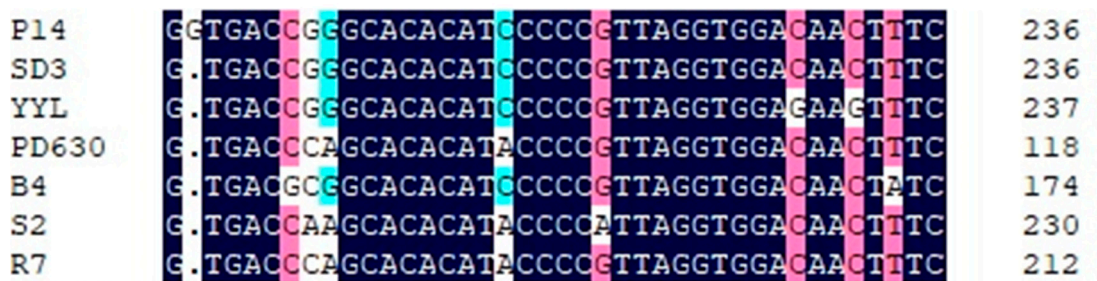

**Figure S5.** (A) Phylogenetic tree of NarL and MalT of *Rhodococcus* sp. P14 obtained from alignment with related proteins from other microorganisms. The numbers on branches refer to the percentage confidence, estimated by a bootstrap analysis with 1000 replications. (B) Alignment of the binding sequences of NarL with other similar sequences.
